# Supplementary material
Source: Research Square preprint supplement (doi:10.21203/rs.3.rs-9389267/v1)
Supplement: Supplementary file 1 [file 135a8f43daad8bf809cbcc6b.docx]

| **Drugs** | **Number of Patients (N)** | **Hypokalaemia, n (%)** | **P-value** |
| --- | --- | --- | --- |
| **Number of drugs** |  |  | 0.08 |
| 0-4 | 205 | 21(10.2) |  |
| 5-9 | 133 | 22(16.5) |  |
| 10 and above | 65 | 13(20.0) |  |
| **Beta blockers** |  |  | 0.19 |
| Yes | 82 | 15(18.3) |  |
| No | 321 | 41(12.8) |  |
| **Alpha blockers** |  |  | 0.60 |
| Yes | 44 | 05(11.4) |  |
| No | 359 | 51(14.2) |  |
| **5 α Reductase inhibitors** |  |  | 1.00 |
| Yes | 14 | 02(14.3) |  |
| No | 389 | 54(13.9) |  |
| **Calcium channel blockers** |  |  | 0.08 |
| Yes | 106 | 20(18.9) |  |
| No | 297 | 36(12.1) |  |
| **Angiotensin-converting enzyme inhibitors** |  |  | 0.47 |
| Yes | 16 | 03(18.8) |  |
| No | 387 | 53(13.7) |  |
| **Angiotensin II receptor blockers** |  |  | 0.72 |
| Yes | 94 | 12(12.8) |  |
| No | 309 | 44(14.2) |  |
| **Sacubitril** |  |  | 1.00 |
| Yes | 09 | 01(11.1) |  |
| No | 394 | 55(14.0) |  |
| **Diuretics excluding aldosterone antagonists** |  |  | **0.000** |
| Yes | 95 | 25(26.3) |  |
| No | 308 | 31(10.1) |  |
| **Aldosterone antagonist** |  |  | 0.78 |
| Yes | 27 | 04(14.8) |  |
| No | 376 | 52(13.8) |  |
| **Anti-platelets** |  |  | 0.27 |
| Yes | 79 | 14(17.7) |  |
| No | 324 | 42(13.1) |  |
| **Statins** |  |  | 0.31 |
| Yes | 74 | 13(17.6) |  |
| No | 329 | 43(13.1) |  |
| **Anti-coagulants** |  |  | 0.71 |
| Yes | 17 | 03(17.6) |  |
| No | 386 | 53(13.7) |  |
| **Thyroid drugs** |  |  | 0.13 |
| Yes | 25 | 06(24.0) |  |
| No | 378 | 50(13.2) |  |
| **Sulfonylureas** |  |  | 0.07 |
| Yes | 67 | 14(20.9) |  |
| No | 336 | 42(12.5) |  |
| **Metformin** |  |  | 0.21 |
| Yes | 83 | 15(18.1) |  |
| No | 320 | 41(12.8) |  |
| **Dipeptidyl peptidase-4 inhibitor** |  |  | 1.00 |
| Yes | 34 | 04(11.8) |  |
| No | 369 | 52(14.1) |  |
| **Voglibose** |  |  | 0.64 |
| Yes | 10 | 02(20.0) |  |
| No | 393 | 54(13.7) |  |
| **Sodium-glucose transport 2 inhibitors** |  |  | 0.75 |
| Yes | 20 | 03(15.0) |  |
| No | 383 | 53(13.8) |  |
| **Pioglitazone** |  |  | 0.60 |
| Yes | 06 | 01(16.7) |  |
| No | 397 | 55(13.9) |  |
| **Insulin** |  |  | 1.00 |
| Yes | 14 | 02(14.3) |  |
| No | 389 | 54(13.9) |  |
| **Nitrates** |  |  | 0.78 |
| Yes | 27 | 04(14.8) |  |
| No | 376 | 52(13.8) |  |
| **Trimetazidine** |  |  | 0.53 |
| Yes | 05 | 01(20.0) |  |
| No | 398 | 55(13.8) |  |
| **Nicorandil** |  |  | 1.00 |
| Yes | 10 | 01(10.0) |  |
| No | 393 | 55(14.0) |  |
| **Xanthines** |  |  | 1.00 |
| Yes | 22 | 03(13.6) |  |
| No | 381 | 53(13.9) |  |
| **Inhaled beta agonists** |  |  | 0.79 |
| Yes | 32 | 5(15.6) |  |
| No | 371 | 51(13.7) |  |
| **Systemic steroid** |  |  | 0.80 |
| Yes | 33 | 5(15.2) |  |
| No | 370 | 51(13.8) |  |
| **Antihistaminic** |  |  | 0.24 |
| Yes | 40 | 08(20.0) |  |
| No | 363 | 48(13.2) |  |
| **Montelukast** |  |  | 0.55 |
| Yes | 25 | 02(08.0) |  |
| No | 378 | 54(14.3) |  |
| **Nonsteroidal anti-inflammatory drugs (excluding paracetamol)** |  |  | 0.78 |
| Yes | 30 | 03(10.0) |  |
| No | 373 | 53(14.2) |  |
| **Paracetamol** |  |  | 0.06 |
| Yes | 35 | 01(02.9) |  |
| No | 368 | 55(14.9) |  |
| **Tramadol** |  |  | 0.40 |
| Yes | 13 | 03(23.1) |  |
| No | 390 | 53(13.6) |  |
| **Muscle relaxant** |  |  | 1.00 |
| Yes | 05 | 00(00.0) |  |
| No | 398 | 56(14.1) |  |
| **Anti vertigo / Betahistine** |  |  | 0.14 |
| Yes | 05 | 02(40.0) |  |
| No | 398 | 54(13.6) |  |
| **Levodopa/carbidopa** |  |  | 0.60 |
| Yes | 08 | 00(00.0) |  |
| No | 395 | 56(14.2) |  |
| **Systemic anti-cholinergic** |  |  | 0.65 |
| Yes | 11 | 02(18.2) |  |
| No | 392 | 54(13.8) |  |
| **Gabapentinoids** |  |  | 1.00 |
| Yes | 17 | 02(11.8) |  |
| No | 386 | 54(14.0) |  |
| **Levetiracetam** |  |  | **0.03** |
| Yes | 06 | 03(50.0) |  |
| No | 397 | 53(13.4) |  |
| **Leflunomide** |  |  | 1.00 |
| Yes | 06 | 00(00.0) |  |
| No | 397 | 56(14.1) |  |
| **Methotrexate** |  |  | 1.00 |
| Yes | 10 | 01(10.0) |  |
| No | 393 | 55(14.0) |  |
| **Typical antipsychotics** |  |  | 0.36 |
| Yes | 03 | 01(33.3) |  |
| No | 400 | 55(13.8) |  |
| **Benzodiazepines and Z-compounds** |  |  | 0.56 |
| Yes | 37 | 04(10.8) |  |
| No | 366 | 52(14.2) |  |
| **Atypical antipsychotics** |  |  | 0.37 |
| Yes | 11 | 00(00.0) |  |
| No | 392 | 56(14.3) |  |
| **Cholinergic drugs/ Drugs used in dementia** |  |  | 1.00 |
| Yes | 04 | 00(00.0) |  |
| No | 399 | 56(14.0) |  |
| **Mirtazapine** |  |  | 0.53 |
| Yes | 05 | 01(20.0) |  |
| No | 398 | 55(13.8) |  |
| **Tricyclic antidepressants** |  |  | 0.40 |
| Yes | 13 | 03(23.1) |  |
| No | 390 | 53(13.6) |  |
| **Duloxetine** |  |  | 0.62 |
| Yes | 09 | 00(00.0) |  |
| No | 394 | 56(14.2) |  |
| **Selective serotonin reuptake inhibitors** |  |  | 0.23 |
| Yes | 14 | 00(00.0) |  |
| No | 389 | 56(14.4) |  |
| **Proton pump inhibitors** |  |  | 0.13 |
| Yes | 97 | 18(18.6) |  |
| No | 306 | 38(12.4) |  |
| **Antacids** |  |  | 0.14 |
| Yes | 05 | 02(40.0) |  |
| No | 398 | 54(13.6) |  |
| **Antiemetic drugs** |  |  | **0.02** |
| Yes | 49 | 12(24.5) |  |
| No | 354 | 44(12.4) |  |
| **Levosulpiride and metoclopramide** |  |  | 0.64 |
| Yes | 10 | 02(20.0) |  |
| No | 393 | 54(13.7) |  |
| **Ondansetron** |  |  | **0.03** |
| Yes | 18 | 06(33.3) |  |
| No | 385 | 50(13.0) |  |
| **Clonidine and moxonidine** |  |  | 1.00 |
| Yes | 07 | 01(14.3) |  |
| No | 396 | 56(13.9) |  |
| **Ranitidine** |  |  | 0.09 |
| Yes | 13 | 04(30.8) |  |
| No | 390 | 52(13.3) |  |
| **Febuxostat** |  |  | 0.64 |
| Yes | 10 | 02(20.0) |  |
| No | 393 | 54(13.7) |  |
| **Ursodeoxycholic acid** |  |  | 1.00 |
| Yes | 04 | 00(00.0) |  |
| No | 399 | 56(14.0) |  |

**Supplementary Table 2:** Drug classes, individual drugs, and their association with hypokalaemia in older inpatients.

Number given out of n=403 for whom complete information about drugs received before admission was available.
