# Supplementary material
Source: Research Square preprint supplement (doi:10.21203/rs.3.rs-9389267/v1)
Supplement: Supplementary file 2 [file 1dbf9fe9417a6367bfe9d7d8.docx]

| **Drugs** | **Number of patients** | **Hyperkalaemia,**  **N (%)** | **P-value** |
| --- | --- | --- | --- |
| **Number of drugs** |  |  | 0.08 |
| 0-4 | 205 | 11(05.4) |  |
| 5-9 | 133 | 12(09.0) |  |
| 10 and above | 65 | 09(13.8) |  |
| **Beta blockers** |  |  | **0.04** |
| Yes | 82 | 11(13.4) |  |
| No | 321 | 21(06.5) |  |
| **Alpha blockers** |  |  | 0.77 |
| Yes | 44 | 04(9.1) |  |
| No | 359 | 28(7.8) |  |
| **5 α Reductase inhibitors** |  |  | 0.30 |
| Yes | 14 | 02(14.3) |  |
| No | 389 | 30(07.7) |  |
| **Calcium channel blockers** |  |  | **0.02** |
| Yes | 106 | 14(13.2) |  |
| No | 297 | 18(06.1) |  |
| **Angiotensin-converting enzyme inhibitors** |  |  | 0.37 |
| Yes | 16 | 02(12.5) |  |
| No | 387 | 30(07.8) |  |
| **Angiotensin II receptor blockers** |  |  | 0.27 |
| Yes | 94 | 10(10.6) |  |
| No | 309 | 22(07.1) |  |
| **Sacubitril** |  |  | 0.53 |
| Yes | 09 | 01(11.1) |  |
| No | 394 | 31(07.9) |  |
| **Diuretics excluding aldosterone antagonists** |  |  | **0.02** |
| Yes | 95 | 13(13.7) |  |
| No | 308 | 19(06.2) |  |
| **Aldosterone antagonist** |  |  | **0.003** |
| Yes | 27 | 07(25.9) |  |
| No | 376 | 25(06.6) |  |
| **Anti-platelets** |  |  | 0.42 |
| Yes | 79 | 08(10.1) |  |
| No | 324 | 24(07.4) |  |
| **Statins** |  |  | **0.01** |
| Yes | 74 | 11(14.9) |  |
| No | 329 | 21(06.4) |  |
| **Anti-coagulants** |  |  | 0.63 |
| Yes | 17 | 02(11.8) |  |
| No | 386 | 30(07.8) |  |
| **Thyroid drugs** |  |  | 0.71 |
| Yes | 25 | 01(4.00) |  |
| No | 378 | 31(08.2) |  |
| **Sulfonylureas** |  |  | 0.41 |
| Yes | 67 | 07(10.4) |  |
| No | 336 | 25(07.4) |  |
| **Metformin** |  |  | **0.01** |
| Yes | 83 | 12(14.5) |  |
| No | 320 | 20(06.2) |  |
| **Dipeptidyl peptidase-4 inhibitor** |  |  | **0.04** |
| Yes | 34 | 06(17.6) |  |
| No | 369 | 26(07.0) |  |
| **Voglibose** |  |  | 0.57 |
| Yes | 10 | 01(10.0) |  |
| No | 393 | 31(07.9) |  |
| **Sodium-glucose transport 2 inhibitors** |  |  | 0.67 |
| Yes | 20 | 02(10.0) |  |
| No | 383 | 30(07.8) |  |
| **Pioglitazone** |  |  | 0.07 |
| Yes | 06 | 02(33.3) |  |
| No | 397 | 30(07.6) |  |
| **Insulin** |  |  | 1.00 |
| Yes | 14 | 01(07.1) |  |
| No | 389 | 31(08.0) |  |
| **Nitrates** |  |  | 0.25 |
| Yes | 27 | 04(14.8) |  |
| No | 376 | 28(07.4) |  |
| **Trimetazidine** |  |  | 1.00 |
| Yes | 05 | 00(00.0) |  |
| No | 398 | 32(08.0) |  |
| **Nicorandil** |  |  | 0.57 |
| Yes | 10 | 01(10.0) |  |
| No | 393 | 31(07.9) |  |
| **Xanthin/theophylline group** |  |  | 0.69 |
| Yes | 22 | 02(09.1) |  |
| No | 381 | 30(07.9) |  |
| **Systemic steroid** |  |  | 0.32 |
| Yes | 33 | 04(12.1) |  |
| No | 370 | 28(07.6) |  |
| **Antihistaminic** |  |  | 0.54 |
| Yes | 40 | 04(10.0) |  |
| No | 363 | 28(07.7) |  |
| **Montelukast** |  |  | 0.43 |
| Yes | 25 | 03(12.0) |  |
| No | 378 | 29(07.7) |  |
| **Nonsteroidal anti-inflammatory drugs (excluding paracetamol)** |  |  | 0.72 |
| Yes | 30 | 03(10.0) |  |
| No | 373 | 29(07.8) |  |
| **Paracetamol** |  |  | 0.51 |
| Yes | 35 | 04(11.4) |  |
| No | 368 | 28(07.6) |  |
| **Tramadol** |  |  | 1.00 |
| Yes | 13 | 01(07.7) |  |
| No | 390 | 31(07.9) |  |
| **Muscle relaxant** |  |  | 1.00 |
| Yes | 05 | 00(00.0) |  |
| No | 398 | 32(08.0) |  |
| **Anti vertigo / Betahistine** |  |  | 1.00 |
| Yes | 05 | 00(00.0) |  |
| No | 398 | 32(08.0) |  |
| **Levodopa/carbidopa** |  |  | 0.49 |
| Yes | 08 | 01(12.5) |  |
| No | 395 | 31(07.8) |  |
| **Systemic anti-cholinergic** |  |  | 0.05 |
| Yes | 11 | 03(27.3) |  |
| No | 392 | 29(07.4) |  |
| **Gabapentinoids** |  |  | 0.64 |
| Yes | 17 | 02(11.8) |  |
| No | 386 | 30(07.8) |  |
| **Levetiracetam** |  |  | 1.00 |
| Yes | 06 | 00(00.0) |  |
| No | 397 | 32(8.1) |  |
| **Leflunomide** |  |  | 1.00 |
| Yes | 06 | 00(00.0) |  |
| No | 397 | 32(08.1) |  |
| **Methotrexate** |  |  | 0.57 |
| Yes | 10 | 01(10.0) |  |
| No | 393 | 31(07.9) |  |
| **Typical antipsychotics** |  |  | 1.00 |
| Yes | 03 | 00(00.0) |  |
| No | 400 | 32(08.0) |  |
| **Benzodiazepines and Z compounds** |  |  | 0.34 |
| Yes | 37 | 01(02.7) |  |
| No | 366 | 31(08.5) |  |
| **Atypical antipsychotics** |  |  | 1.00 |
| Yes | 11 | 00(00.0) |  |
| No | 392 | 32(08.2) |  |
| **Cholinergic drugs/ drugs used in dementia** |  |  | 1.00 |
| Yes | 04 | 00(00.0) |  |
| No | 399 | 32(08.0) |  |
| **Mirtazapine** |  |  | 0.34 |
| Yes | 05 | 01(20.0) |  |
| No | 398 | 31(07.8) |  |
| **Tricyclic antidepressants** |  |  | 0.07 |
| Yes | 13 | 03(23.1) |  |
| No | 390 | 29(07.4) |  |
| **Duloxetine** |  |  | 1.00 |
| Yes | 09 | 00(00.0) |  |
| No | 394 | 32(8.1) |  |
| **Selective serotonin reuptake inhibitors** |  |  | 1.00 |
| Yes | 14 | 01(07.1) |  |
| No | 389 | 31(08.0) |  |
| **Proton pump inhibitors** |  |  | 0.06 |
| Yes | 97 | 12(12.4) |  |
| No | 306 | 20(06.5) |  |
| **Antacids** |  |  | 0.34 |
| Yes | 05 | 01(20.0) |  |
| No | 398 | 31(07.8) |  |
| **Antiemetic drugs** |  |  | 0.26 |
| Yes | 49 | 06(12.2) |  |
| No | 354 | 26(07.3) |  |
| **Levosulpiride and metoclopramide** |  |  | 1.00 |
| Yes | 10 | 00(00.0) |  |
| No | 393 | 32(08.1) |  |
| **Ondansetron** |  |  | 0.64 |
| Yes | 18 | 02(11.1) |  |
| No | 385 | 30(07.8) |  |
| **Clonidine and moxonidine** |  |  | 0.44 |
| Yes | 07 | 01(14.3) |  |
| No | 396 | 31(07.8) |  |
| **Ranitidine** |  |  | 0.07 |
| Yes | 13 | 03(23.1) |  |
| No | 390 | 29(07.4) |  |
| **Febuxostat** |  |  | 0.57 |
| Yes | 10 | 01(10.0) |  |
| No | 393 | 31(07.9) |  |
| **Ursodeoxycholic acid** |  |  | 1.00 |
| Yes | 04 | 00(00.0) |  |
| No | 399 | 32(08.0) |  |

**Supplementary Table 4:** Drugs and their association with hyperkalaemia in older inpatients (n=403)

Number given out of n=403 for whom complete information about drugs received before admission was available.
