# Supplementary material
Source: Research Square preprint supplement (doi:10.21203/rs.3.rs-9389267/v1)
Supplement: Supplementary file 3 [file 2e9764d59d3398c7dc4d16a4.docx]

| Parameter | Number of patients | Hypokalaemia  n (%) | P-value |
| --- | --- | --- | --- |
| Age (years) |  |  | 0.88 |
| 50-64 | 87 | 11(12.6) |  |
| 65-79 | 237 | 34(14.3) |  |
| 80 and above | 87 | 11(12.6) |  |
| Sex |  |  | **0.03** |
| Male | 230 | 24(10.4) |  |
| Female | 181 | 32(17.7) |  |
| Diabetes mellitus |  |  | 0.27 |
| Yes | 156 | 25(16.0) |  |
| No | 255 | 31(12.2) |  |
| Hypertension |  |  | 0.09 |
| Yes | 237 | 38(16.0) |  |
| No | 174 | 18(10.3) |  |
| Chronic heart failure |  |  | 0.99 |
| Yes | 66 | 09(13.6) |  |
| No | 345 | 47(13.6) |  |
| Lung disease |  |  | 0.90 |
| Yes | 71 | 10(14.1) |  |
| No | 340 | 46(13.5) |  |
| Coronary artery disease |  |  | 0.29 |
| Yes | 88 | 15(17.0) |  |
| No | 323 | 41(12.7) |  |
| Atrial fibrillation |  |  | 1.0 |
| Yes | 32 | 04(12.5) |  |
| No | 379 | 52(13.7) |  |
| Old cerebrovascular accident |  |  | 0.70 |
| Yes | 14 | 01(17.1) |  |
| No | 397 | 55(13.9) |  |
| Neurodegenerative disease |  |  | 0.79 |
| Yes | 34 | 05(14.7) |  |
| No | 377 | 51(13.5) |  |
| Benign prostatic hyperplasia |  |  | 0.68 |
| Yes | 97 | 12(12.4) |  |
| No | 314 | 44(14.0) |  |
| Rheumatoid arthritis / inflammatory arthropathy |  |  | 0.49 |
| Yes | 20 | 01(05.0) |  |
| No | 391 | 55(14.1) |  |
| Osteoarthritis |  |  | 0.49 |
| Yes | 64 | 07(10.9) |  |
| No | 347 | 49(14.1) |  |
| Osteoporosis |  |  | 0.77 |
| Yes | 27 | 04(14.8) |  |
| No | 384 | 52(13.5) |  |
| Thyroid abnormality |  |  | 0.69 |
| Yes | 45 | 07(15.6) |  |
| No | 366 | 49(13.4) |  |
| Chronic liver disease |  |  | 0.74 |
| Yes | 20 | 03(15.0) |  |
| No | 391 | 53(13.6) |  |
| Chronic kidney disease |  |  | 0.33 |
| Yes | 45 | 04(08.9) |  |
| No | 366 | 52(14.2) |  |
| Epilepsy/seizures |  |  | **0.05** |
| Yes | 16 | 05(31.2) |  |
| No | 395 | 51(12.9) |  |
| Neuropsychiatric illness |  |  | 1.00 |
| Yes | 13 | 01(07.7) |  |
| No | 398 | 55(13.8) |  |
| Malignancy |  |  | **0.02** |
| Yes | 19 | 06(31.6) |  |
| No | 392 | 50(12.8) |  |
| Neuropathic Pain |  |  | 0.70 |
| Yes | 14 | 01(07.1) |  |
| No | 397 | 55(13.9) |  |
| Hyponatremia |  |  | 0.12 |
| Yes | 188 | 31(16.5) |  |
| No | 223 | 25(11.2) |  |

**Table 2: Unadjusted risk factors of hypokalaemia in older inpatients (n=411)**
