# Supplementary material
Source: Research Square preprint supplement (doi:10.21203/rs.3.rs-9389267/v1)
Supplement: Supplementary file 4 [file 3cb2a12551b2556bb8f13815.docx]

| Group A (n=3) | Group B (n=14) |  | Group B  (n=14) | Group C (n=12) |
| --- | --- | --- | --- | --- |
| *Etiology* | | | | |
| ARBs (n=1)  Telmisartan (1) | **ARBs (n=4)**  Telmisartan (4) | **Kidney disease** | 14 | 12 |
| Aldosterone antagonist (1)  Spironolactone (1) | **Aldosterone antagonist (4)**  Spironolactone (4) |  | | |
| ARBs and NSAIDs (1)  Telmisartan and polmacoxib (1) | **NSAIDs (2)**  Nimesulide (1), Piroxicam (1) |
|  | **ARBs and aldosterone antagonist (2)**  Valsartan and spironolactone (1)  Telmisartan and spironolactone (1) |
| **ACEIs (2)**  Ramipril (2) |
| *Severity of hyperkalaemia*  ≥ 6.5 mEq/L |  |  | | |
| 0 | 2 |  | | 0 |

**Table 4** : **Drugs and other aetiologies of hyperkalaemia in older inpatients.**

Aetiologies were not known for three cases; 29 cases of hyperkalaemia, hence, could be categorized into the three groups.

ACEIs: Angiotensin converting enzyme inhibitors, ARBs: Angiotensin receptor blockers, NSAIDS: Nonsteroidal anti-inflammatory drugs
