# Supplementary material
Source: Research Square preprint supplement (doi:10.21203/rs.3.rs-9389267/v1)
Supplement: Supplementary file 5 [file 504e23ffbd42e637f7e310c1.docx]

| **Tentative risk factor** | **P-value** | **Adjusted odds ratio** | **Confidence interval** |
| --- | --- | --- | --- |
| **Sex**  Male (Reference)  Female | **0.049** | 1.83 | 1.0 – 3.3 |
| **Malignancy**  No (Reference)  Yes | 0.057 | 2.86 | 0.97 – 8.5 |
| **Diuretics excluding aldosterone antagonists**  No (Reference)  Yes | **0.001** | 2.94 | 1.6 – 5.4 |
| **Levetiracetam**  No (Reference)  Yes | **0.030** | 6.45 | 1.2 – 34.6 |
| **Ondansetron**  No (Reference)  Yes | 0.210 | 2.02 | 0.67 – 0.10 |

**Table 3: Adjusted risk factors of hypokalaemia in older inpatients (n=403)**
