# Supplementary material
Source: Research Square preprint supplement (doi:10.21203/rs.3.rs-9389267/v1)
Supplement: Supplementary file 6 [file 7ec473ae268c07c3fc3c3136.docx]

| **Parameter** | **Number of Patients** | **Hyperkalaemia**  **n (%)** | **P-value** |
| --- | --- | --- | --- |
| **Age ( in years)** |  |  | 0.61 |
| 50-64 years | 87 | 06(6.9) |  |
| 65-79 years | 237 | 21(8.9) |  |
| 80 and above | 87 | 05(5.7) |  |
| **Sex** |  |  | **0.009** |
| Male | 230 | 25(10.9) |  |
| Female | 181 | 07(3.9) |  |
| **Diabetes Mellitus** |  |  | 0.06 |
| Yes | 156 | 17(10.9) |  |
| No | 255 | 15(5.9) |  |
| **Hypertension** |  |  | 0.34 |
| Yes | 237 | 21(8.9) |  |
| No | 174 | 11(6.3) |  |
| **Chronic Heart Failure** |  |  | 0.35 |
| Yes | 66 | 07(10.6) |  |
| No | 345 | 25(7.2) |  |
| **Lung Disease** |  |  | 0.46 |
| Yes | 71 | 04(5.6) |  |
| No | 340 | 28(8.2) |  |
| **Coronary Artery Disease** |  |  | 0.06 |
| Yes | 88 | 11(12.5) |  |
| No | 323 | 21(6.5) |  |
| **Atrial Fibrillation** |  |  | 0.30 |
| Yes | 32 | 04(12.5) |  |
| No | 379 | 28(7.4) |  |
| **Old cerebrovascular accident** |  |  | 0.30 |
| Yes | 14 | 02(14.3) |  |
| No | 397 | 30(7.6) |  |
| **Neurodegenerative Disease** |  |  | 0.50 |
| Yes | 34 | 01(2.9) |  |
| No | 377 | 31(8.2) |  |
| **Benign Prostatic Hyperplasia** |  |  | **0.009** |
| Yes | 97 | 14(14.4) |  |
| No | 314 | 18(5.7) |  |
| **Rheumatoid arthritis / inflammatory arthropathy** |  |  | 0.20 |
| Yes | 20 | 03(15.0) |  |
| No | 391 | 29(7.4) |  |
| **Osteoarthritis** |  |  | 1.00 |
| Yes | 64 | 05(7.8) |  |
| No | 347 | 27(7.8) |  |
| **Osteoporosis** |  |  | 1.00 |
| Yes | 27 | 02(7.4) |  |
| No | 384 | 30(7.8) |  |
| **Thyroid Abnormality** |  |  | 0.77 |
| Yes | 45 | 04(8.9) |  |
| No | 366 | 28(7.7) |  |
| **Chronic liver disease** |  |  | 0.20 |
| Yes | 20 | 03(15.0) |  |
| No | 391 | 29(7.4) |  |
| **Chronic kidney disease** |  |  | **0.000** |
| Yes | 45 | 12(26.7) |  |
| No | 366 | 20(5.5) |  |
| **Epilepsy/Seizures** |  |  | 0.62 |
| Yes | 16 | 0(0.0) |  |
| No | 395 | 32(08.1) |  |
| **Neuropsychiatric Illness** |  |  | 1.00 |
| Yes | 13 | 01(7.7) |  |
| No | 398 | 31(7.8) |  |
| **Malignancy** |  |  | 1.00 |
| Yes | 19 | 01(05.3) |  |
| No | 392 | 31(07.9) |  |
| **Neuropathic Pain** |  |  | 0.61 |
| Yes | 14 | 0(0.0) |  |
| No | 397 | 32(08.1) |  |
| **Hyponatremia** |  |  | 0.11 |
| Yes | 188 | 19(10.1) |  |
| No | 223 | 13(5.8) |  |

**Supplementary Table 3:** Unadjusted risk factors of hyperkalaemia in older inpatients (n=411)
