# Supplementary material
Source: Research Square preprint supplement (doi:10.21203/rs.3.rs-9389267/v1)
Supplement: Supplementary file 7 [file a7ceee90a7c686a78cf79a4c.docx]

| **Number of patients** (male, female) | 411 (230, 181) |
| --- | --- |
| **Mean age (**± SD**) in years** | 71.38 ± 8.69 |
| **Common co-morbidities**  Hypertension  Diabetes mellitus  Benign prostatic hyperplasia  Coronary artery disease  Lung disease  Congestive heart failure  Osteoarthritis  Thyroid abnormality  Neurodegenerative diseases  Atrial fibrillation  Osteoporosis  Rheumatoid arthritis and other inflammatory arthropathies  Malignancy  Epilepsy/seizure disorders  Old cerebrovascular accident  Neuropathic pain  Neuropsychiatric diseases | 237  156  97  88  71  66  64  45  34  32  27  20  19  16  14  14  13 |
| **Median number of drugs (Q1-Q3)** | 4 (1-8) |
| **Common drugs**  Calcium channel blockers  Proton pump inhibitors  Diuretics excluding aldosterone antagonists  Angiotensin receptor blockers  Metformin  Beta blockers  Antiplatelets  Statins  Sulfonylureas  Antiemetics  Alpha blockers  Antihistaminics  Benzodiazepines and z compounds  Paracetamol  Dipeptidyl peptidase-4 inhibitor  Systemic steroids  Nonsteroidal anti-inflammatory drugs excluding paracetamol | 106  97  95  94  83  82  79  74  67  49  44  40  37  35  34  33  30 |

**Supplementary Table 1**: Baseline characteristics of enrolled patients
