# Supplementary material
Source: Research Square preprint supplement (doi:10.21203/rs.3.rs-9389267/v1)
Supplement: Supplementary file 8 [file c92bdb163bc63d2264199445.docx]

| Group A (n=36) | Group B (n=2) |  | Group B  (n=2) | Group C (n=11) |
| --- | --- | --- | --- | --- |
| *Serum K+* (mEq/L)  Median (Q1-Q3) | ***Serum K+*** (mEq/L)  (Mean ± SD) |  |  | ***Serum K+*** (mEq/L)  Median (Q1-Q3) |
| 3.0 (2.9-3.2) | 2.6 ± 0.07 |  |  | 2.9 (2.7-3.0) |
| *Individual etiology* | | | | |
| Diuretics (n=18)  Torsemide (8)  Furosemide (3)  Hydrochlorothiazide (4)  Chlorthalidone (2)  Indapamide (1) | **Diuretics (n=1)**  Torsemide (1) | **Dehydration** | 1 | 6 |
| Diuretics and beta agonists (4)  Furosemide and salbutamol (4) | **Steroids (n=1)**  Dexamethasone (n=1) | **Chronic liver disease** | 1 | -- |
| Antibiotics (4)  Injection amikacin and ceftriaxone (1)  Injection amikacin (1)  Injection linezolid and polymyxin (1)  Oral levofloxacin (1) |  | **Diuresis** | -- | 2 |
| Diuretics and xanthine (2)  Chlorthalidone, torsemide, and theophylline-etophylline (1)  Hydrochlorothiazide and theophylline-etophylline (1) | **Poor intake** | -- | 1 |
| Antibiotics and beta agonist (1)  Injection linezolid, injection piperacillin tazobactam, and salbutamol (1) | **Adrenal hyperactivity** | -- | 1 |
| Antibiotics and SGLT-2 inhibitors (1)  Levofloxacin and dapagliflozin (1) | **Respiratory alkalosis** | -- | 1 |
| Antibiotics and steroids (1)  Levofloxacin and fludrocortisone | -- | | |
| Insulin and diuretics (1)  Insulin and furosemide (1) |
| SGLT-2 inhibitors (1)  Dapagliflozin (1) |
| Injection Vitamin B12 (1) |
| Beta agonist and xanthines (1)  Salbutamol and theophylline-etophylline (1) |
| Beta agonist (1)  Salbutamol (1) |
| *Severity of hypokalaemia*  *<2.5 mEq/L* |  |  | | |
| 2 (5.5%) | 0 |  | | 2 (18.2%) |
| *Mortality* |  |  | | |
| *2*.8% | 0 |  | | 20% |

**Table 1:** **Drugs and other aetiologies of hypokalaemia in older inpatients.**

Exact aetiologies were not known for seven cases; 49 cases of hypokalaemia, hence, could be categorized into the three groups.

SGLT: sodium-glucose cotransporter 2
